# Supplementary material
Source: PubMed Central journal article supplement (PMC6518916)

**Mutational and transcriptomic profiling of acute leukemia of ambiguous lineage reveals obscure but clinically important lineage bias**

Zhen-Tang Lao,<sup>1,2</sup> Ling-Wen Ding,<sup>1,\*</sup> Omer An,<sup>1</sup> Norimichi Hattori,<sup>3</sup> Qiao-Yang Sun,<sup>1</sup> Kar-Tong Tan,<sup>4</sup> Anand Mayakonda,<sup>1</sup> Wong Gee Chuan,<sup>2</sup> Vikas Madan,<sup>1</sup> De-Chen Lin,<sup>5</sup> Henry Yang<sup>1</sup> and H. Phillip Koeffler<sup>1,5</sup>

<sup>1</sup>Cancer Science Institute of Singapore, National University of Singapore, Singapore; <sup>2</sup>Department of Haematology, Singapore General Hospital, Singapore; <sup>3</sup>Division of Hematology, Department of Medicine, Showa University, Tokyo, Japan; <sup>4</sup>Division of Medical Sciences, Harvard Medical School, Boston, MA, USA and <sup>5</sup>Division of Hematology/Oncology, Cedars-Sinai Medical Center, UCLA School of Medicine, Los Angeles, CA, USA

Correspondence: LING-WEN DING.  
dinglingwen@hotmail.com/csdlw@nus.edu.sg  
doi:10.3324/haematol.2018.202911

## Supplementary Methods

### Samples

One patient (case 348) has collection of sequential samples (diagnosis, remission and relapse. We sequenced all his samples and used his remission sample as germline control). We unfortunately do not have matched germline samples for the additional 14 patients. The sequenced ALAL samples were obtained from cryopreserved diagnostic bone marrow aspirate specimens. These samples were taken when a potential patient was referred for a bone marrow biopsy after the appropriate consents were given. The samples were diluted with equal samples of Hank's balanced salt solution, layered onto Ficoll, centrifuged and aspirated into a sterile tube. Samples were then counted, washed and resuspended to obtain concentration of 10 million cells per ml. The specimens were then aliquoted into cryovials and gradually cooled to -80 degrees Celsius before being transferred into liquid nitrogen. DNA and RNA were extracted from the liquid nitrogen samples and used for sequencing.

### Exome sequencing analysis

We used a highly stringent bioinformatics pipeline that we developed previously extensively to remove germline SNP (1-8). The mutation list was filtered with dbSNP131, 1,000 genome, The Exome Aggregation Consortium database (ExAC, <http://exac.broadinstitute.org/>), Esp5400 [NHLBI Exome Sequencing Project (ESP) Exome Variant] exome database (<http://evs.gs.washington.edu/EVS/>), UCSC repeat filters and our in-house manually curated SNP database with the following criteria (10, 11):

For dbSNP database: Latest versions of dbSNP database (dbSNP137, dbSNP 138 etc.) were not utilized as they are contaminated with some well-characterized somatic oncogenic mutations: e.g., *NRAS* G12D (rs121913237), *IDH2* R140Q (rs121913502) [see below Table (10)]. For SNPs present in dbSNP131 but also marked with CLINSIG=pathogenic in ClinVAR database, each of them were manually inspected to determine whether those SNPs were associated with leukemia/cancer, before they were filtered from our list.

Presence of well appreciated somatic cancer/leukemic drivers in dbSNP and exome sequencing database of ExAC and Esp5400:

|                     | 1000<br>genome | dbSNP<br>P131 | dbSNP137    | dbSNP138    | dbSNP141    | ExAC<br>frequency | ESP5400<br>frequency |
|---------------------|----------------|---------------|-------------|-------------|-------------|-------------------|----------------------|
| <i>DNMT3A</i> R882H | NA             | NA            | rs147001633 | rs147001633 | rs147001633 | 0.0005449         | 0.000744             |
| <i>DNMT3A</i> R882C | NA             | NA            | NA          | rs377577594 | rs377577594 | 0.0003551         | 0.000279             |
| <i>DNMT3A</i> S714C | NA             | NA            | NA          | rs367909007 | rs367909007 | 0.00004119        | 0.000093             |
| <i>IDH2</i> R140Q   | NA             | NA            | rs121913502 | rs121913502 | rs121913502 | 0.00009884        | NA                   |
| <i>IDH2</i> R172K   | NA             | NA            | rs121913503 | rs121913503 | rs121913503 | NA                | NA                   |
| <i>IDH1</i> R132H   | NA             | NA            | rs121913500 | rs121913500 | rs121913500 | NA                | NA                   |
| <i>FLT3</i> D835Y   | NA             | NA            | rs121913488 | rs121913488 | NA          | NA                | NA                   |
| <i>U2AF1</i> S34F   | NA             | NA            | NA          | rs371769427 | rs371769427 | 0.00004213        | 0.000093             |
| <i>KRAS</i> G12D    | NA             | NA            | rs121913529 | rs121913529 | NA          | 0.00001976        | NA                   |
| <i>KRAS</i> G13C    | NA             | NA            | rs121913535 | rs121913535 | NA          | NA                | NA                   |
| <i>KRAS</i> G13D    | NA             | NA            | rs112445441 | rs112445441 | NA          | NA                | NA                   |
| <i>NRAS</i> Q61K    | NA             | NA            | rs121913254 | rs121913254 | NA          | NA                | NA                   |
| <i>NRAS</i> G12D    | NA             | NA            | rs121913237 | rs121913237 | NA          | 0.000008237       | NA                   |

NA: not detected in the database.

We filtered the mutation list with 1,000 genome, ExAC, and Esp5400 etc. Because some important leukemia drivers [such as *DNMT3A* R882H (0.0005) or *IDH2* R140: *DNMT3A* R882 (ExAC: *DNMT3A*, Arg882His= 0.0005449; Arg882Cys=0.0003551; Arg882Pro=0.00005779; Arg882Leu = 0.000008256) or *IDH2* R140 (Arg140Gln = 0.00009884)] were also present at very low frequency in the blood samples of normal elderly people (9-11) and annotated as SNP in some database, we manually checked and curated the list (before and after filtering) to make sure that those well appreciated AML drivers had not been removed.

We used the UCSC repeat filters (genomicSuperDups, microsatellite\_hits, interrupted\_repeats, repeat\_masker, simple\_tandem\_repeats) to remove all of the SNVs site located in the repeat and low complexity region.

Concerning the recent discovery that some of the early leukemia mutations (e.g., *DNMT3A*, *IDH2* etc.) often persisted in remission sample (1, 9-14), we also performed analysis of each sample of case 384 (diagnosis, remission and relapse) separately to examine whether any such mutation exist.

**Supplementary Table 1. Summary of ALAL patients of this study.**

| Case | Diagnosis             | Age | Karyotype                                                                                                                                        | Immunophenotype                                                                                                                                                                         |
|------|-----------------------|-----|--------------------------------------------------------------------------------------------------------------------------------------------------|-----------------------------------------------------------------------------------------------------------------------------------------------------------------------------------------|
| 774  | AUL With t(v;11q23.3) | 17  | 46, XY, t(11;19)(q23;p13.3)                                                                                                                      | MPO-, CD117+ CD33-, partial CD13+, partial CD11b+, CD36-, CD64-, CD14-, Cytoplasmic CD3- CD7+ CD2- CD5- CD4- CD8- CD1a- CD56- CD19- CD10- Tdt- CD123-.                                  |
| 1542 | AUL With t(v;11q23.3) | 53  | 44, XX, der(4)t(4;11)(p16;q23), add(5)(q11.2), -7, -8, der(11;18)t(11;18)(p11.2;p11.2) t(4;11)(p16;q23), add13(p13), del(17)(p13), -18, -21, -22 | MPO-, Partial DIM CD33+, CD13+, CD117+, CD11b-, CD36-, CD14-, CD34+, HLA-DR+, GA -, CD41-, CD61-, Cytoplasmic CD3-, CD4-, CD7-, CD8-, CD19-, CD79a-, CD10-, CD22-, CD123-, CD56-, Tdt-. |
| 1190 | AUL                   | 61  | 46, XX                                                                                                                                           | MPO-, CD33+, CD13+, CD117+, CD11b-, CD36-, CD14-, CD34+, HLA-DR+, GA-, Cytoplasmic CD3-, CD1a-, CD19-, CD79a-, CD10-, CD123-, CD56-, Tdt-                                               |
| 1373 | AUL                   | 64  | 47, XX +10                                                                                                                                       | CD1a-, CD2-, CD3-, Cytoplasmic CD3-, CD4-, CD8-, CD5+, CD7+, Partial CD34+, TdT-, CD56-, CD11b-, CD14-, CD64-.                                                                          |
| 1169 | AUL                   | 65  | 40-42, XY, -5, add(7)(q11.2), -12, -13, add15(p11.2), -16, -17,-20                                                                               | CD34+, CD117+, MPO-, CD3-, CD79a-, CD19-, CD10-, CD11b-, CD14-, CD4-, CD56-.                                                                                                            |
| 1568 | AUL                   | 78  | 45, XY, -2, add(3)(q12), add(4)(q25), i(5)(p10), -6, del(7)(q22), +8, -11, add13(q34), -16, -17, -20                                             | Dim CD45+, MPO-, CD13+, CD33-, CD117+, Partial CD34+, CD36-, CD64-, CD14-, CD11b-, cCD3-, CD7-, CD19-, CD10-, CD79a-, CD41-, CD61-, GA-, CD123-, CD4-, CD56-.                           |
| 5694 | AUL                   | 54  | 45, X -Y                                                                                                                                         | CD7+, Partial CD33+, Partial CD117+, Partial HLA-DR+, CD13-, CD11b-, CD4+, CD123dim+, CD71dim+, CD38-, MPO-, CD19-, Cytoplasmic CD3-, CD79a-, CD56-, CD64-, CD14-, Tdt-, CD45dim+.      |

|      |                                       |    |                                                                              |                                                                                                                                                       |
|------|---------------------------------------|----|------------------------------------------------------------------------------|-------------------------------------------------------------------------------------------------------------------------------------------------------|
| 348  | MPAL M/T,<br>NOS                      | 33 | 46, XY, add(4)(q21),<br>add(9)(p22), del(20)(q1?)                            | Cytoplasmic CD3+, MPO+, CD7+,<br>CD13+, CD33+, CD34+, CD56+, HLA-<br>DR+, Tdt+, CD4-, CD8-, CD10-, CD20-,<br>CD117-.                                  |
| 281  | MPAL M/B,<br>NOS                      | 44 | 46, XX[20]                                                                   | CD19+, CD79a+, Partial CD33+, CD34+,<br>CD11b+, MPO+, Partial Tdt+, CD3- and<br>CD117-.                                                               |
| 683  | MPAL M/B,<br>NOS                      | 36 | 46, XX, t(13;14)(q14;q24)                                                    | MPO+, Partial CD3+, CD33-, CD11b-,<br>CD117-, CD34+, CD19+, CD10-,<br>CD79a+, Partial TDT+, CD3-, CD7-.                                               |
| 1251 | MPAL with<br>t(9;22)(q34.<br>1;q11.2) | 61 | 46, XY, t(9;22)(q34;q11.2)                                                   | One population expressing CD34+,<br>CD19+, CD10+, CD79a+, Tdt+, cCD3-<br>and another expressing CD34+, MPO+<br>CD19+ (partial), CD10-, CD79a-, cCD3-. |
| 1408 | MPAL with<br>t(9;22)(q34.<br>1;q11.2) | 47 | 45, XY, -7, t(9;22)                                                          | CD3-, Cytoplasmic CD3-, CD7+, CD19+,<br>CD10+, CD79a+, TdT+, CD13+, CD33+,<br>CD117+, CD11b-, CD34+ and MPO+.                                         |
| 1034 | MPAL with<br>t(9;22)(q34.<br>1;q11.2) | 22 | 46, XY, t(9;22)(q34;q11.2)                                                   | MPO+, Partial CD33+, CD13-, CD36-,<br>CD64-, CD14-, Partial CD19+, CD10+,<br>CD79a+, TdT+, CD34+, CD117-, CD3-,<br>CD7-.                              |
| 1030 | MPAL with<br>t(9;22)(q34.<br>1;q11.2) | 32 | 46, XY, add(1)(q21),<br>der(9)t(1;9) (q25;q34),<br>der(22)t(9;22)(q34;q11.2) | MPO+, CD33+, CD13-, CD19+ CD79a+,<br>TdT+, CD34+, CD3-                                                                                                |
| 5684 | MPAL with<br>t(9;22)(q34.<br>1;q11.2) | 64 | 46, XX, der9 inv9 t(9;22)                                                    | CD3-, CD7+, CD19+, CD10+, CD79a+,<br>TdT+, CD13+, CD33+, CD117+, CD11b-,<br>CD34+ and MPO+.                                                           |

Age: age at diagnosis; v, variable chromosome; MPO, Myeloperoxidase, a protein synthesized during myeloid differentiation.

**Supplementary Table 2. ALAL patients: DNA repair and chromosome stability gene mutations.**

Gene information were cited from Genecards and Wikipedia.

| Patient ID | Mutations                                                                                                                                                                                                                                                                                                                                                                                                                                                                                                                                                                                                               |
|------------|-------------------------------------------------------------------------------------------------------------------------------------------------------------------------------------------------------------------------------------------------------------------------------------------------------------------------------------------------------------------------------------------------------------------------------------------------------------------------------------------------------------------------------------------------------------------------------------------------------------------------|
| 1408       | <i>BRCA2</i> (stop-gain, S1001*), involved in repair of damaged DNA(15). VAF=0.51.                                                                                                                                                                                                                                                                                                                                                                                                                                                                                                                                      |
| 1373       | <i>ERCC6</i> (frameshift, K476Rfs*11). Coding for Cockayne syndrome B (CSB) protein, which is important in transcription-coupled excision DNA repair (16). VAF=0.42.                                                                                                                                                                                                                                                                                                                                                                                                                                                    |
| 1568       | <i>MDC1</i> (Inframe deletion of 40 amino acids, S1570_E1610del), Mediator of DNA Damage Checkpoint protein 1(17-20). VAF=0.23.<br><br><i>TP53</i> (V143M, and deletion of 17/17p), involved in DNA repair. V143M is a deleterious common mutation according to TP53 mutation database [ <a href="http://p53.iarc.fr/">http://p53.iarc.fr/</a> , number of occurrence in somatic dataset (number of tumors reported to carry this mutation) = 35]. Mutation in the same position have been recorded in 50 cancer samples in COSMIC database and 39 cancer samples in cbiportal TCGA pan cancer database (21). VAF=0.25. |
| 683        | <i>PRKDC</i> (frameshift, I1085Sfs*17), also known as DNA-PKcs is a kinase that acts as a molecular sensor for DNA damage. Involved in DNA non-homologous end joining required for double-strand break (DSB) repair and VDJ recombination (22-24). VAF=0.15.                                                                                                                                                                                                                                                                                                                                                            |
| 774        | <i>RAD21</i> (K70E), involved in the repair of DNA double-strand breaks, as well as in chromatid cohesion during mitosis (25, 26). VAF=0.13.                                                                                                                                                                                                                                                                                                                                                                                                                                                                            |
| 1542       | <i>FANCD2</i> (frameshift, Y103Lfs*77), required for maintenance of chromosomal stability. Promotes accurate and efficient pairing of homologs during meiosis. Involved in the repair of DNA double-strand breaks. FANCD2 mutant mice have a significantly increased incidence of cancer. Humans with a FANCD2 deficiency have increased risk of AML (27-33). VAF=0.69                                                                                                                                                                                                                                                  |

|      |                                                                                                                                                                                                                                                                                                                                                                                                                                                                                                                                                                                                            |
|------|------------------------------------------------------------------------------------------------------------------------------------------------------------------------------------------------------------------------------------------------------------------------------------------------------------------------------------------------------------------------------------------------------------------------------------------------------------------------------------------------------------------------------------------------------------------------------------------------------------|
|      | <i>ERCC8</i> (P53T), Excision Repair 8, involved in DNA repair pathway. VAF=0.51.                                                                                                                                                                                                                                                                                                                                                                                                                                                                                                                          |
| 1190 | <i>TDG</i> (Inframe insertion, I137_P141dup), G/T Mismatch-Specific Thymine DNA Glycosylase, involved in DNA base excision repair (34, 35). VAF=0.06<br><i>PARP1</i> (K324Q), involved in DNA base excision repair pathway (36-40). VAF=0.45.                                                                                                                                                                                                                                                                                                                                                              |
| 1169 | <i>TP53</i> (E286K, and deletion of 17/17p), involved in DNA repair. E286K is a common deleterious mutation according to TP53 mutation database [ <a href="http://p53.iarc.fr/">http://p53.iarc.fr/</a> , number of occurrence in somatic dataset (number of tumors reported to carry this mutation) = 96]. Hotspot mutation, mutation in the same position have been recorded in 113 cancer samples in COSMIC database and 101 cancer samples in cbiportal TCGA pan cancer database(21). VAF=0.2.<br><br><i>NEK1</i> (stop-gain, Y168*), involved in DNA damage sensing/repair pathway (41-43). VAF=0.26. |
| 5694 | <i>CHEK1</i> (D47N), checkpoint Kinase 1, It is required for checkpoint mediated cell cycle arrest in response to DNA damage (44, 45).VAF=0.14.                                                                                                                                                                                                                                                                                                                                                                                                                                                            |
| 1251 | <i>E2F7</i> (Q506L), involved in DNA damage response: up-regulated by P53 following genotoxic stress, and acts as a downstream effector of TP53-dependent repression of target genes involved in DNA replication (46-48). VAF=0.47.<br><br><i>SPC24</i> (R5C), acts as a component of the essential kinetochore-associated NDC80 complex, which is required for chromosome segregation and spindle checkpoint activity (49). VAF=0.5.                                                                                                                                                                      |
| 1030 | <i>RAD51API</i> (A104D), may participate in a common DNA damage response pathway associated with the activation of homologous recombination and double-strand break repair (50-54). VAF=0.06.                                                                                                                                                                                                                                                                                                                                                                                                              |
| 1034 | <i>RPA2</i> (A100V), Replication Protein A2, involved in DNA replication, repair, recombination and telomere maintenance (55-57). VAF=0.19.                                                                                                                                                                                                                                                                                                                                                                                                                                                                |

### Supplementary Table 3. The mutation list of ALAL patients.

(see excel file “Mutation list of ALAL.xlsx”)

#### References

1. Sun QY, Ding LW, Tan KT, et al. Ordering of mutations in acute myeloid leukemia with partial tandem duplication of MLL (MLL-PTD). *Leukemia*. 2017;31(1):1-10.
2. Ding LW, Sun QY, Tan KT, et al. Mutational Landscape of Pediatric Acute Lymphoblastic Leukemia. *Cancer Res*. 2017;77(2):390-400.
3. Lin DC, Hao JJ, Nagata Y, et al. Genomic and molecular characterization of esophageal squamous cell carcinoma. *Nat Genet*. 2014;46(5):467-473.
4. Lin DC, Meng X, Hazawa M, et al. The genomic landscape of nasopharyngeal carcinoma. *Nat Genet*. 2014;46(8):866-871.
5. Garg M, Nagata Y, Kanojia D, et al. Profiling of somatic mutations in acute myeloid leukemia with FLT3-ITD at diagnosis and relapse. *Blood*. 2015;126(22):2491-2501.
6. Madan V, Shyamsunder P, Han L, et al. Comprehensive mutational analysis of primary and relapse acute promyelocytic leukemia. *Leukemia*. 2016;30(8):1672-1681.
7. Chien W, Sun QY, Ding LW, et al. Diagnosis and relapse: cytogenetically normal acute myelogenous leukemia without FLT3-ITD or MLL-PTD. *Leukemia*. 2017;31(3):762-766.
8. Lin DC, Mayakonda A, Dinh HQ, et al. Genomic and Epigenomic Heterogeneity of Hepatocellular Carcinoma. *Cancer Research*. 2017;77(9):2255-2265.
9. Jaiswal S, Fontanillas P, Flannick J, et al. Age-related clonal hematopoiesis associated with adverse outcomes. *N Engl J Med*. 2014;371(26):2488-2498.
10. Xie M, Lu C, Wang J, et al. Age-related mutations associated with clonal hematopoietic expansion and malignancies. *Nat Med*. 2014;20(12):1472-1478.
11. Genovese G, Kahler AK, Handsaker RE, et al. Clonal hematopoiesis and blood-cancer risk inferred from blood DNA sequence. *N Engl J Med*. 2014;371(26):2477-2487.
12. Koefler HP, Leong G. Preleukemia: one name, many meanings. *Leukemia*. 2017;31(3):534-542.
13. Busque L, Patel JP, Figueroa ME, et al. Recurrent somatic TET2 mutations in normal elderly individuals with clonal hematopoiesis. *Nat Genet*. 2012;44(11):1179-1181.
14. Ploen GG, Nelderby L, Guldborg P, et al. Persistence of DNMT3A mutations at long-term remission in adult patients with AML. *Br J Haematol*. 2014;167(4):478-486.
15. Yoshida K, Miki Y. Role of BRCA1 and BRCA2 as regulators of DNA repair, transcription, and cell cycle in response to DNA damage. *Cancer Sci*. 2004;95(11):866-871.
16. de Waard H, de Wit J, Andressoo JO, et al. Different effects of CSA and CSB deficiency on sensitivity to oxidative DNA damage. *Mol Cell Biol*. 2004;24(18):7941-7948.
17. Stewart GS, Wang B, Bignell CR, Taylor AM, Elledge SJ. MDC1 is a mediator of the mammalian DNA damage checkpoint. *Nature*. 2003;421(6926):961-966.
18. Lou Z, Minter-Dykhouse K, Wu X, Chen J. MDC1 is coupled to activated CHK2 in mammalian DNA damage response pathways. *Nature*. 2003;421(6926):957-961.
19. Goldberg M, Stucki M, Falck J, et al. MDC1 is required for the intra-S-phase DNA damage checkpoint. *Nature*. 2003;421(6926):952-956.
20. Stucki M, Jackson SP. MDC1/NFBD1: a key regulator of the DNA damage response in higher eukaryotes. *DNA Repair (Amst)*. 2004;3(8-9):953-957.



21. Williams AB, Schumacher B. p53 in the DNA-Damage-Repair Process. *Cold Spring Harb Perspect Med.* 2016;6(5).
22. Zhang S, Yajima H, Huynh H, et al. Congenital bone marrow failure in DNA-PKcs mutant mice associated with deficiencies in DNA repair. *J Cell Biol.* 2011;193(2):295-305.
23. Oksenyich V, Kumar V, Liu X, et al. Functional redundancy between the XLF and DNA-PKcs DNA repair factors in V(D)J recombination and nonhomologous DNA end joining. *Proc Natl Acad Sci U S A.* 2013;110(6):2234-2239.
24. Neema M, Navarro-Quiroga I, Chechlacz M, et al. DNA damage and nonhomologous end joining in excitotoxicity: neuroprotective role of DNA-PKcs in kainic acid-induced seizures. *Hippocampus.* 2005;15(8):1057-1071.
25. Xu H, Balakrishnan K, Malaterre J, et al. Rad21-cohesin haploinsufficiency impedes DNA repair and enhances gastrointestinal radiosensitivity in mice. *PLoS One.* 2010;5(8):e12112.
26. Bauerschmidt C, Arrichiello C, Burdak-Rothkamm S, et al. Cohesin promotes the repair of ionizing radiation-induced DNA double-strand breaks in replicated chromatin. *Nucleic Acids Res.* 2010;38(2):477-487.
27. Nepal M, Che R, Ma C, Zhang J, Fei P. FANCD2 and DNA Damage. *Int J Mol Sci.* 2017;18(8).
28. Grompe M. FANCD2: a branch-point in DNA damage response? *Nat Med.* 2002;8(6):555-556.
29. Andreassen PR, D'Andrea AD, Taniguchi T. ATR couples FANCD2 monoubiquitination to the DNA-damage response. *Genes Dev.* 2004;18(16):1958-1963.
30. Fu D, Dudimah FD, Zhang J, et al. Recruitment of DNA polymerase eta by FANCD2 in the early response to DNA damage. *Cell Cycle.* 2013;12(5):803-809.
31. MacKay C, Declais AC, Lundin C, et al. Identification of KIAA1018/FAN1, a DNA repair nuclease recruited to DNA damage by monoubiquitinated FANCD2. *Cell.* 2010;142(1):65-76.
32. Jin S, Mao H, Schnepf RW, et al. Menin associates with FANCD2, a protein involved in repair of DNA damage. *Cancer Res.* 2003;63(14):4204-4210.
33. Nakanishi K, Taniguchi T, Ranganathan V, et al. Interaction of FANCD2 and NBS1 in the DNA damage response. *Nat Cell Biol.* 2002;4(12):913-920.
34. Nakamura T, Murakami K, Tada H, et al. Thymine DNA glycosylase modulates DNA damage response and gene expression by base excision repair-dependent and independent mechanisms. *Genes Cells.* 2017;22(4):392-405.
35. Da LT, Shi Y, Ning G, Yu J. Dynamics of the excised base release in thymine DNA glycosylase during DNA repair process. *Nucleic Acids Res.* 2018;46(2):568-581.
36. Lu Y, Kwintkiewicz J, Liu Y, et al. Chemosensitivity of IDH1-Mutated Gliomas Due to an Impairment in PARP1-Mediated DNA Repair. *Cancer Res.* 2017;77(7):1709-1718.
37. Khoury-Haddad H, Guttmann-Raviv N, Ipenberg I, Huggins D, Jeyasekharan AD, Ayoub N. PARP1-dependent recruitment of KDM4D histone demethylase to DNA damage sites promotes double-strand break repair. *Proc Natl Acad Sci U S A.* 2014;111(7):E728-737.
38. Na TY, Ka NL, Rhee H, et al. Interaction of hepatitis B virus X protein with PARP1 results in inhibition of DNA repair in hepatocellular carcinoma. *Oncogene.* 2016;35(41):5435-5445.
39. Ying S, Chen Z, Medhurst AL, et al. DNA-PKcs and PARP1 Bind to Unresected Stalled DNA Replication Forks Where They Recruit XRCC1 to Mediate Repair. *Cancer Res.* 2016;76(5):1078-1088.
40. Mao Z, Hine C, Tian X, et al. SIRT6 promotes DNA repair under stress by activating PARP1. *Science.* 2011;332(6036):1443-1446.
41. Liu S, Ho CK, Ouyang J, Zou L. Nek1 kinase associates with ATR-ATRIP and primes ATR for efficient DNA damage signaling. *Proc Natl Acad Sci U S A.* 2013;110(6):2175-2180.
42. Pelegri AL, Moura DJ, Brenner BL, et al. Nek1 silencing slows down DNA repair and blocks DNA damage-induced cell cycle arrest. *Mutagenesis.* 2010;25(5):447-454.

43. Chen Y, Chen CF, Riley DJ, Chen PL. Nek1 kinase functions in DNA damage response and checkpoint control through a pathway independent of ATM and ATR. *Cell Cycle*. 2011;10(4):655-663.
44. Abe H, Alavattam KG, Kato Y, et al. CHEK1 coordinates DNA damage signaling and meiotic progression in the male germline of mice. *Hum Mol Genet*. 2018;27(7):1136-1149.
45. Ranuncolo SM, Polo JM, Melnick A. BCL6 represses CHEK1 and suppresses DNA damage pathways in normal and malignant B-cells. *Blood Cells Mol Dis*. 2008;41(1):95-99.
46. Mitxelena J, Apraiz A, Vallejo-Rodriguez J, et al. An E2F7-dependent transcriptional program modulates DNA damage repair and genomic stability. *Nucleic Acids Res*. 2018.
47. Carvajal LA, Hamard PJ, Tonnessen C, Manfredi JJ. E2F7, a novel target, is up-regulated by p53 and mediates DNA damage-dependent transcriptional repression. *Genes Dev*. 2012;26(14):1533-1545.
48. Zalmas LP, Zhao X, Graham AL, et al. DNA-damage response control of E2F7 and E2F8. *EMBO Rep*. 2008;9(3):252-259.
49. Ma L, McQueen J, Cuschieri L, Vogel J, Measday V. Spc24 and Stu2 promote spindle integrity when DNA replication is stalled. *Mol Biol Cell*. 2007;18(8):2805-2816.
50. Pires E, Sung P, Wiese C. Role of RAD51AP1 in homologous recombination DNA repair and carcinogenesis. *DNA Repair (Amst)*. 2017;59:76-81.
51. Liang F, Longerich S, Miller AS, et al. Promotion of RAD51-Mediated Homologous DNA Pairing by the RAD51AP1-UAF1 Complex. *Cell Rep*. 2016;15(10):2118-2126.
52. Parpys AC, Kratz K, Speed MC, Leung SG, Schild D, Wiese C. RAD51AP1-deficiency in vertebrate cells impairs DNA replication. *DNA Repair (Amst)*. 2014;24:87-97.
53. Dunlop MH, Dray E, Zhao W, et al. Mechanistic insights into RAD51-associated protein 1 (RAD51AP1) action in homologous DNA repair. *J Biol Chem*. 2012;287(15):12343-12347.
54. Modesti M, Budzowska M, Baldeyron C, Demmers JA, Ghirlando R, Kanaar R. RAD51AP1 is a structure-specific DNA binding protein that stimulates joint molecule formation during RAD51-mediated homologous recombination. *Mol Cell*. 2007;28(3):468-481.
55. Liaw H, Lee D, Myung K. DNA-PK-dependent RPA2 hyperphosphorylation facilitates DNA repair and suppresses sister chromatid exchange. *PLoS One*. 2011;6(6):e21424.
56. Wang H, Guan J, Wang H, Perrault AR, Wang Y, Iliakis G. Replication protein A2 phosphorylation after DNA damage by the coordinated action of ataxia telangiectasia-mutated and DNA-dependent protein kinase. *Cancer Res*. 2001;61(23):8554-8563.
57. Lee DH, Pan Y, Kanner S, Sung P, Borowiec JA, Chowdhury D. A PP4 phosphatase complex dephosphorylates RPA2 to facilitate DNA repair via homologous recombination. *Nat Struct Mol Biol*. 2010;17(3):365-372.
58. Qian M, Zhang H, Kham SK, et al. Whole-transcriptome sequencing identifies a distinct subtype of acute lymphoblastic leukemia with predominant genomic abnormalities of EP300 and CREBBP. *Genome Res*. 2017;27(2):185-195.

## **Supplementary Figure Legends**

**Supplementary Figure 1.** A. Cluster analysis of RNA sequencing results of 8 ALAL samples, clustered together with RNA sequencing data of AML (randomly selected, 25 cases from the TCGA AML cohort), pediatric B-ALL and T-ALL (randomly selected, 25 cases of B-ALL and 25 cases of T-ALL from EGAS00001001858)(58). The cluster analysis was performed using 367 myeloid/lymphoid expressing signature genes. B. Hierarchical tree showing the Cluster analysis result of (A). The ALAL samples were highlighted with blue color rectangle boxes.

**Supplementary Figure 2.** A. Overall survival analysis of ALAL patient based on disease subtype. B. Overall survival analysis of ALAL patient based on the age (>60 vs <60) of patients. P values were calculated by Log-rank test.

# Supplementary Figure 1

A

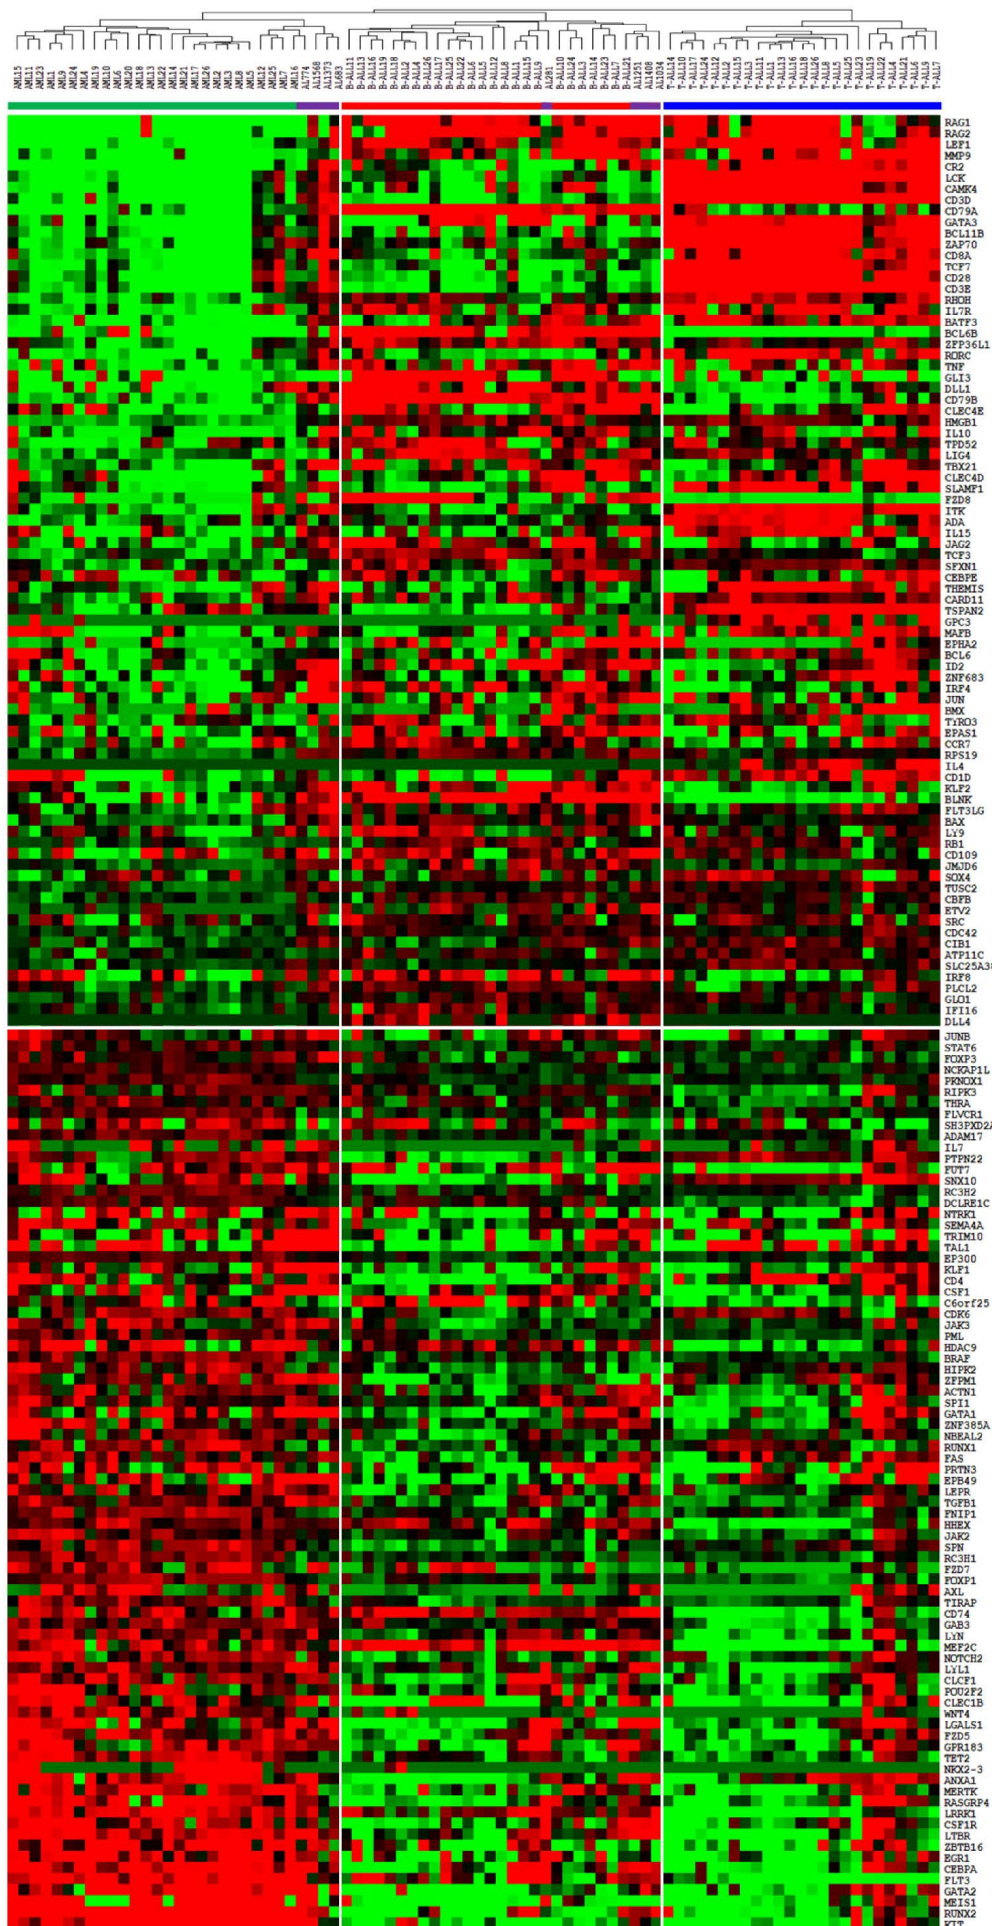

AML

B-ALL

T-ALL

B

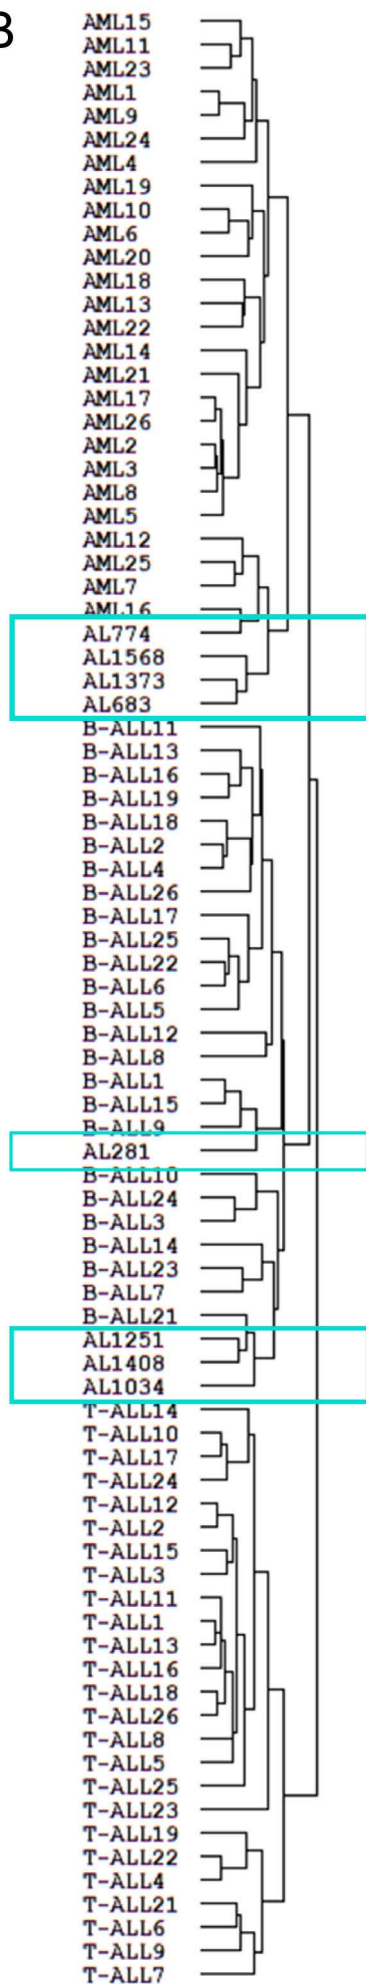

Supplementary Figure 2

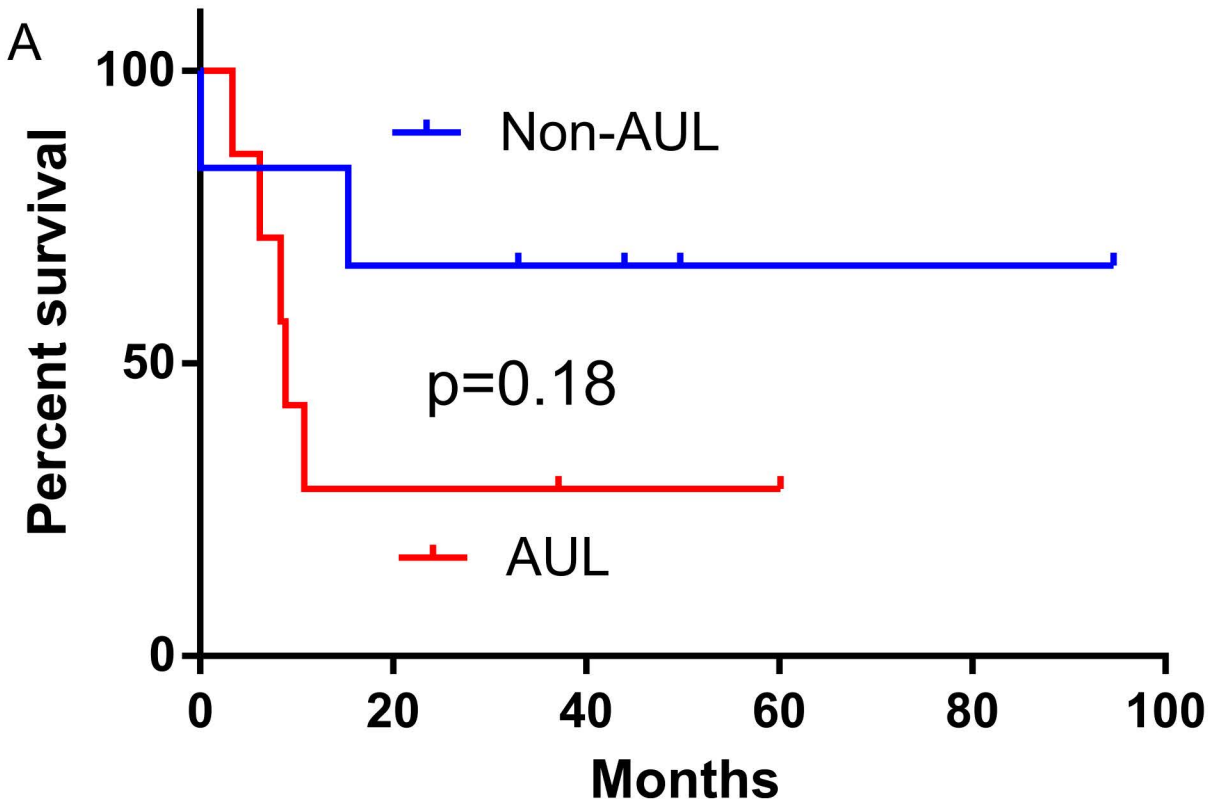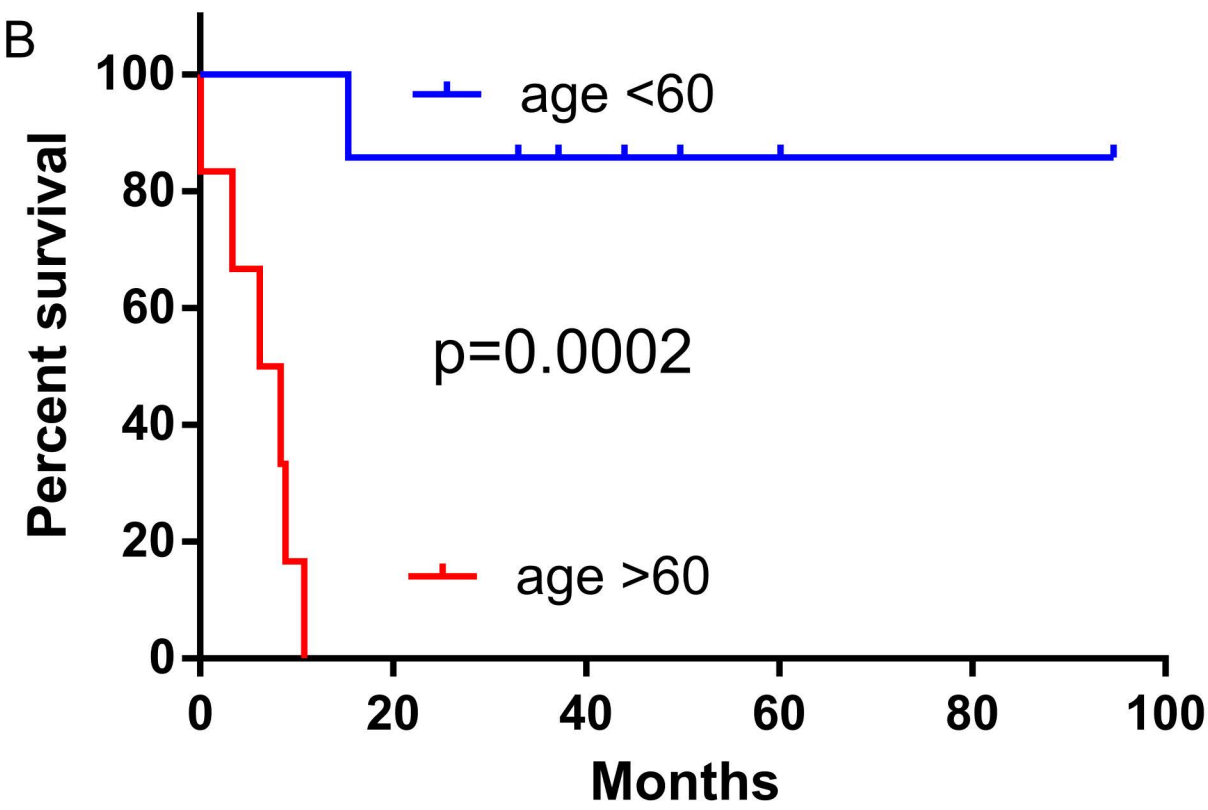

Supplement: 2018.202911.LAO_SUPPL.pdf [file 2018.202911.LAO_SUPPL.pdf]
