# Supplementary material
Source: PubMed Central journal article supplement (PMC6518916)
Supplement: 2018_202911-Disclosures_and_Contributions.pdf [file 2018_202911-Disclosures_and_Contributions.pdf]

Haematologica  
HAEMATOL/2018/202911  
Version 4

Mutational and transcriptomic profiling of acute leukemia of ambiguous lineage reveals obscure but clinically important lineage bias

Zhen-Tang Lao, Ling Wen Ding, Omer An, Norimichi Hattori,  
Qiao-Yang Sun, Kar-Tong Tan, Anand Mayakonda, Wong Gee Chuan,  
Vikas Madan, De-Chen Lin, Henry Yang, and H. Phillip Koeffler

Disclosures: The authors declare that they have no competing interests.

Contributions: ZTL, LWD and HPK conceived and designed the research study and wrote the manuscript. ZTL, LWD, NH and QYS performed the experiments. LWD, OA, KTT, AM, DCL and HY performed the bioinformatics analysis. WGC and VM analysed and interpreted data.
